# Supplementary material
Source: Springer Nature journal article supplement (https://www.springermedizin.de/resource/supplementary/12872_2014_836_MOESM1_ESM.pdf/9430580)

- Informed Consent
- Cardiopulmonary Exercise Test
- Run-In (3 Weeks)
  - 9 Exercise Training Sessions
  - Randomized (if attended 6 of 9)

**R  
A  
N  
D  
O  
M  
I  
Z  
A  
T  
I  
O  
N**

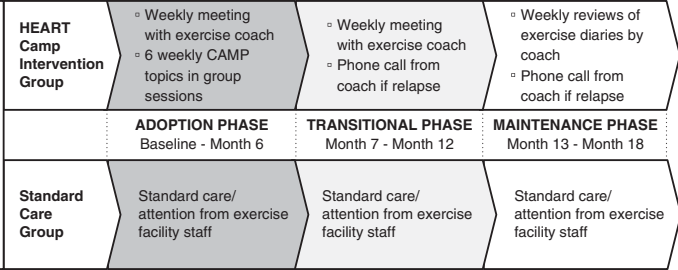

Supplement: MOESM1 [file 9430580]
